# Supplementary material
Source: publisher site journal article supplement (https://www.dovepress.com/article/351948)
Supplement: Supplementary file 1 [file get_supplementary_file.php]

**Appendix table 1**: STROBE statement checklist of items included in this observational study.

|  | Item No. | Recommendation | Page No. | Relevant text from  manuscript |
| --- | --- | --- | --- | --- |
| **Title and abstract** | 1 | (*a*) Indicate the study’s design with a commonly used term in the title or the abstract | 1 | Prospective Study |
| (*b*) Provide in the abstract an informative and balanced summary of what was done and what was found | 2 | Abstract |
| Introduction | | |  |  |
| Background/rationale | 2 | Explain the scientific background and rationale for the investigation being reported | 3 | Introduction |
| Objectives | 3 | State specific objectives, including any prespecified hypotheses | 3 | Introduction-  Figure-1 |
| Methods | | |  |  |
| Study design | 4 | Present key elements of study design early in the paper | 4 | Material and Method –Study settings and design |
| Setting | 5 | Describe the setting, locations, and relevant dates, including periods of recruitment, exposure, follow-up, and data collection | 4 | Material and Method – Study settings and design |
| Participants | 6 | (*a*) *Cohort study*—Give the eligibility criteria, and the sources and methods of selection of participants. Describe methods of follow-up  *Case-control study*—Give the eligibility criteria, and the sources and methods of case ascertainment and control selection. Give the rationale for the choice of cases and controls  *Cross-sectional study*—Give the eligibility criteria, and the sources and methods of selection of participants | 4 | Material and Method –Participants |
| (*b*)*Cohort study*—For matched studies, give matching criteria and number of exposed and unexposed  *Case-control study*—For matched studies, give matching criteria and the number of controls per case |  |  |
| Variables | 7 | Clearly define all outcomes, exposures, predictors, potential confounders, and effect modifiers. Give diagnostic criteria, if applicable | 4/5 | Material and Method – Study construct and outcome measures |
| Data sources/ measurement | 8* | For each variable of interest, give sources of data and details of methods of assessment (measurement). Describe comparability of assessment methods if there is more than one group |  | Material and Method – Study construct and outcome measures |
| Bias | 9 | Describe any efforts to address potential sources of bias |  |  |
| Study size | 10 | Explain how the study size was arrived at | *4* | Material and Method – Participants |
| Quantitative variables | 11 | Explain how quantitative variables were handled in the analyses. If applicable, describe which groupings were chosen and why | 5 | Statistical Analysis |
| Statistical methods | 12 | (*a*) Describe all statistical methods, including those used to control for confounding | 5 | Statistical Analysis |
| (*b*) Describe any methods used to examine subgroups and interactions |  |  |
| (*c*) Explain how missing data were addressed |  |  |
| (*d*) *Cohort study*—If applicable, explain how loss to follow-up was addressed  *Case-control study*—If applicable, explain how matching of cases and controls was addressed  *Cross-sectional study*—If applicable, describe analytical methods taking account of sampling strategy | 5 | Statistical Analysis |
| (*e*) Describe any sensitivity analyses |  |  |
| Results |  |  |  |  |
| Participants | 13* | (a) Report numbers of individuals at each stage of study—eg numbers potentially eligible, examined for eligibility, confirmed eligible, included in the study, completing follow-up, and analysed | 5/6 | Result-Descriptive Statistics/Appendix table 2 |
|  |  | (b) Give reasons for non-participation at each stage |  |  |
|  |  | (c) Consider use of a flow diagram | 5 | Result- Appendix table 2 |
| Descriptive data | 14* | (a) Give characteristics of study participants (eg demographic, clinical, social) and information on exposures and potential confounders | 5 | Result- Descriptive Statistics/ Appendix table 2-3/ Figure 2 |
|  |  | (b) Indicate number of participants with missing data for each variable of interest |  |  |
|  |  | (c) *Cohort study*—Summarise follow-up time (eg, average and total amount) |  |  |
| Outcome data | 15* | *Cohort study*—Report numbers of outcome events or summary measures over time |  |  |
|  |  | *Case-control study—*Report numbers in each exposure category, or summary measures of exposure |  |  |
|  |  | *Cross-sectional study—*Report numbers of outcome events or summary measures | 6/7 | Result- Table 1-2/ Figure 2-3/ Appendix table 2-3/ Appendix Figure-1 |
| Main results | 16 | (*a*) Give unadjusted estimates and, if applicable, confounder-adjusted estimates and their precision (eg, 95% confidence interval). Make clear which confounders were adjusted for and why they were included | 6/7 | Result- Table 1-2/ Figure 2-3/ Appendix table 2-3/ Appendix Figure 1 |
|  |  | (*b*) Report category boundaries when continuous variables were categorized |  |  |
|  |  | (*c*) If relevant, consider translating estimates of relative risk into absolute risk for a meaningful time period |  |  |
| Other analyses | 17 | Report other analyses done—eg analyses of subgroups and interactions, and sensitivity analyses | 6/7 | Result |
| Discussion |  |  |  |  |
| Key results | 18 | Summarise key results with reference to study objectives | 7/8 | Discussion |
| Limitations | 19 | Discuss limitations of the study, taking into account sources of potential bias or imprecision. Discuss both direction and magnitude of any potential bias | 8 | Discussion- Limitations |
| Interpretation | 20 | Give a cautious overall interpretation of results considering objectives, limitations, multiplicity of analyses, results from similar studies, and other relevant evidence | 8/9 | Conclusion/Interpretation |
| Generalisability | 21 | Discuss the generalisability (external validity) of the study results | 8/9 | Conclusion/Interpretation |
| Other information |  |  |  |  |
| Funding | 22 | Give the source of funding and the role of the funders for the present study and, if applicable, for the original study on which the present article is based |  | Entered during submission process as required by SAGE |

*Give information separately for cases and controls in case-control studies and, if applicable, for exposed and unexposed groups in cohort and cross-sectional studies.

**Appendix table 2:** Socio demographics and dental related information of included patients during imposed social restrictions [Unlock 1.0 (restrained confinement) and Unlock 2.0 (mild confinement)].

| **Characteristics of study participant** | **Unlock 1.0**  **(N=72)** | **Unlock 2.0**  **(N=64)** | ***p* value*** |
| --- | --- | --- | --- |
| **Gender**  Male  Female | 47 (65.27)  25 (34.72) | 32 (50)  32 (50) | 0.069 |
| **Age**  19-29  30-39  40-49  >50 | 13 (18.05)  22 (30.55)  13 (18.05)  24 (33.33) | 15 (23.43)  20 (31.25)  8 (11.11)  21 (32.81) | 0.865 |
| **Education**  Primary /Secondary  Intermediate  University Graduate  Post-graduate (Masters and Ph.D.) | 2 (2.70)  62 (8.61)  4 (5.55)  4 (5.55) | 7 (10.93)  17 (26.56)  33 (51.56)  7 (10.93) | 0.854 |
| **Diet**  Vegetarian  Mixed | 66 (92.6)  6 (8.33) | 58 (90.62)  6 (9.37) | 0.534 |
| **Dental Clinical visit per year**  1-2  3-4 | 60 (83.33)  12 (16.66) | 54 (84.37)  10 (15.62) | 0.526 |
| **Comorbid condition**  Diabetes  Hypertension | 10 (13.88)  8 (11.11) | 6 (9.37)  5 (7.81) | 0.331 |
| **Number of tooth decay**  One  Two | 34 (47.22)  8 (11.11) | 32 (50)  3 (4.68) | 0.129 |
| **Type of Dental Procedure**  Root canal treatment  Tooth Extraction | 48 (66.66)  24 (33.33) | 47 (73.43)  17 (26.56) | 0.373 |
| **COVID-19 Test**  Yes  No | 8 (11.11)  64 (88.89) | 11(17.18)  53 (73.61) | 0.214 |

**p-value* was considered significant at <0.05

NOTE: Data are represented in N (%) unless otherwise indicated.

**Appendix table 3**: Prevalence of Fear of COVID-19 (FCV-19) in association with socio-demographics and dental-related information of study participants.

| **Characteristics of study participant** | **n (%)** | **Fear of COVID-19** | | ***p*** | **Partial η2** | **95% Confidence interval** | |
| --- | --- | --- | --- | --- | --- | --- | --- |
| **Mean** | **SE** | **LL** | **UL** |
| **Gender**  Male  Female | 57 (41.9)  79 (58.1) | 3.05  3.38 | 0.18  0.16 | 0.205 | 0.032 | 2.68 | 3.43 |
| **Age**  19-29  30-39  40-49  >50 | 28 (20.6)  42 (30.9)  21 (15.4)  45 (33.1) | 2.98  2.96  3.59  3.51 | 0.25  0.22  0.34  0.22 | **<0.001*** | **0.184** | 2.47  2.52  2.87  3.07 | 3.49  3.40  4.31  3.95 |
| **Education**  Primary /Secondary  Intermediate  University Graduate  Post-graduate (Masters and Ph.D.) | 9 (6.61)  79 (58.08)  37 (27.20)  11 (8.08) | 2.01  3.96  2.20  2.59 | 0.40  0.13  0.16  0.45 | **<0.001*** | **0.351** | 1.08  3.69  1.87  1.59 | 2.94  4.24  2.54  3.60 |
| **Diet**  Vegetarian  Mixed | 124 (91.2)  12 (8.8) | 3.28  2.84 | 0.13  0.45 | 0.442 | 0.008 | 3.03  1.84 | 3.54  3.84 |
| **Dental clinical visit per year**  1-2  3-4 | 114  22 | 3.25  3.20 | 0.14  0.27 | **0.002*** | **0.086** | 2.98  2.65 | 3.53  3.76 |
| **Comorbid condition**  Diabetes  Hypertension | 16 (11.8)  13 (9.6) | 4.01  4.12 | 0.43  0.47 | 0.336 | 0.336 | 3.10  3.23 | 4.93  5.00 |
| **Number of tooth decay**  One  Two | 125 (91.9)  11 (8.1) | 3.20  3.71 | 0.12  0.47 | 0.268 | 0.269 | 2.95  2.66 | 3.46  4.76 |
| **Type of dental procedure**  Root canal treatment  Tooth Extraction | 95 (69.9)  41 (30.1) | 3.13  3.50 | 0.15  0.21 | 0.178 | 0.013 | 2.83  3.07 | 3.44  3.93 |
| **COVID-19 Test**  Yes  No | 19  117 | 3.09  3.27 | 0.32  0.13 | 0.625 | 0.002 | 2.41  3.00 | 3.78  3.54 |

**p-value* was considered significant at <0.05.

All significant values are marked bold.

Abbreviations: LL, lower limit; UL, upper limit;

Note: Eta-squared values (η2) measures the strength of relationship between two variables

**Appendix figure 1:** Simple slope diagram representing survey group moderating the relationship between Fear of COVID-19 and COVID-19 risk perception **[A]**; Satisfaction with life moderating the relationship between Fear of Covid-19 and COVID-19 risk perception **[B]**.
